# Supplementary material
Source: PubMed Central journal article supplement (PMC3717253)
Supplement: NIHMS488584-supplement-Table_S1.pdf [file NIHMS488584-supplement-Table_S1.pdf]

**Table S1: Genes with two-fold upregulation in A549-I29 as compared to A549-EV11**

| Gene symbol      | Gene product                                                                        | A549-EV11 vs A549-plgR29 |                  |                  |          |
|------------------|-------------------------------------------------------------------------------------|--------------------------|------------------|------------------|----------|
|                  |                                                                                     | Function                 | Membrane protein | Secreted protein | p values |
| PDCD1LG1 (CD274) | Programmed cell death 1 ligand 1 (CD274 antigen)                                    |                          | Yes              |                  | 0,00000  |
| ZNF432           | Zinc finger protein 432                                                             |                          |                  |                  | 0,00000  |
| TRPM6            | Transient receptor potential cation channel, subfamily M, member 6                  |                          | Yes              |                  | 0,00001  |
| UGT8             | UDP glycosyltransferase 8 (UDP-galactose ceramide galactosyltransferase)            |                          | Yes              |                  | 0,00004  |
| RSAD2            | Radical S-adenosyl methionine domain containing 2                                   |                          | Yes              |                  | 0,00008  |
| ODZ2             | Odz, odd Oz/ten-m homolog 2 (Drosophila)                                            |                          | Yes              |                  | 0,00008  |
| LOC399959        | Hypothetical gene supported by BX647608                                             |                          |                  |                  | 0,00011  |
| IL24             | Interleukin 24                                                                      |                          |                  | Yes              | 0,00019  |
| HS6ST2           | Heparan sulfate 6-O-sulfotransferase 2                                              |                          | Yes              |                  | 0,00019  |
| RAB3B            | RAB3B, member RAS oncogene family                                                   |                          | Yes              | Yes              | 0,00025  |
| FLJ22662         | Hypothetical protein FLJ22662                                                       |                          |                  | Yes              | 0,00027  |
| BDNF             | Brain-derived neurotrophic factor opposite strand                                   |                          |                  | Yes              | 0,00032  |
| BCAT1            | Branched chain aminotransferase 1, cytosolic                                        |                          |                  |                  | 0,00037  |
| EMP1             | Epithelial membrane protein 1                                                       |                          | Yes              |                  | 0,00043  |
| SLC16A14         | Solute carrier family 16 (monocarboxylic acid transporters), member 14              |                          | Yes              |                  | 0,00047  |
| KRT19            | Keratin 19                                                                          |                          |                  |                  | 0,00049  |
| ARG99 (TMTC1)    | Transmembrane and tetratricopeptide repeat containing 1                             |                          | Yes              |                  | 0,00070  |
| ESRRG            | Estrogen-related receptor gamma                                                     |                          |                  |                  | 0,00071  |
| SNAI2            | Snail homolog 2 (Drosophila)                                                        |                          |                  |                  | 0,00079  |
| C1orf24          | Chromosome 1 open reading frame 24                                                  |                          |                  |                  | 0,00115  |
| GATA3            | GATA binding protein 3                                                              |                          |                  |                  | 0,00170  |
| SPARC            | Secreted protein, acidic, cysteine-rich (osteonectin); basement-membrane protein 40 |                          |                  | Yes              | 0,00174  |
| SLC1A3           | Solute carrier family 1 (glial high affinity glutamate transporter), member 3       |                          | Yes              |                  | 0,00206  |
| PLCB4            | Phospholipase C, beta 4                                                             |                          |                  |                  | 0,00327  |
| NDN              | Necdin homolog (mouse)                                                              |                          |                  |                  | 0,00346  |
| TLE4             | Transducin-like enhancer of split 4 (E(sp1) homolog, Drosophila)                    |                          |                  |                  | 0,00368  |
| FLI1             | Friend leukemia virus integration 1                                                 |                          |                  |                  | 0,00382  |
| NEXN             | Nexilin (F actin binding protein)                                                   |                          |                  | Yes              | 0,00407  |
| MAP3K14          | Mitogen-activated protein kinase 14                                                 |                          |                  |                  | 0,00462  |
| GFRA1            | GDNF family receptor alpha 1                                                        |                          | Yes              |                  | 0,00488  |
| JUN              | v-jun sarcoma virus 17 oncogene homolog (avian)                                     |                          |                  |                  | 0,00495  |
| TOX              | Thymus high mobility group box protein TOX                                          |                          |                  |                  | 0,00501  |
| DIO2             | Deiodinase, iodothyronine, type II                                                  |                          | Yes              |                  | 0,00501  |
| ZNF573           | Zinc finger protein 573                                                             |                          |                  |                  | 0,00549  |
| CYR61            | Cysteine-rich, angiogenic inducer, 61                                               |                          |                  | Yes              | 0,00731  |
| CEACAM6          | Carcinoembryonic antigen-related cell adhesion molecule 6                           |                          | Yes              |                  | 0,00750  |
| COL13A1          | Collagen, type XIII, alpha 1                                                        |                          | Yes              |                  | 0,00939  |
| CA8              | Carbonic anhydrase VIII                                                             |                          |                  |                  | 0,01014  |
| TFPI2            | Tissue factor pathway inhibitor 2                                                   |                          |                  | Yes              | 0,01037  |
| NS3TP2 (GRAMD3)  | HCV NS3-transactivated protein 2 (GRAM domain-containing protein 3)                 |                          |                  |                  | 0,01071  |
| LYPD1            | LY6/PLAUR domain containing 1                                                       |                          | Yes              |                  | 0,01438  |
| LY6K             | Lymphocyte antigen 6 complex, locus K                                               |                          | Yes              | Yes              | 0,02065  |
| PIGR             | Polymeric immunoglobulin receptor                                                   |                          | Yes              |                  | 0,02308  |
| PPAP2B           | Phosphatidic acid phosphatase type 2B                                               |                          | Yes              |                  | 0,02606  |
| EGR1             | Early growth response 1                                                             |                          |                  |                  | 0,02826  |
