# Supplementary material
Source: PubMed Central journal article supplement (PMC3717253)
Supplement: NIHMS488584-supplement-Table_S2.pdf [file NIHMS488584-supplement-Table_S2.pdf]

**Table S2: Genes with two-fold downregulation in A549-I29 as compared to A549-EV11**

| Gene symbol       | Gene product                                                             | Membrane protein | Secreted protein | A549-EV11 vs A549-plgR29 p values |
|-------------------|--------------------------------------------------------------------------|------------------|------------------|-----------------------------------|
|                   | Function                                                                 |                  |                  |                                   |
| CP                | Ceruloplasmin (ferroxidase)                                              |                  | Yes              | 0,00000                           |
| VAMP8             | Vesicle-associated membrane protein 8 (endobrevin)                       | Yes              |                  | 0,00000                           |
| CNTN1             | Contactin 1                                                              | Yes              |                  | 0,00000                           |
| OLFML3            | Olfactomedin-like 3                                                      |                  | Yes              | 0,00000                           |
| HPS3; CP          | Hermansky-Pudlak syndrome 3; Ceruloplasmin (ferroxidase)                 |                  |                  | 0,00000                           |
| FBXW2             | F-box and WD-40 domain protein 2                                         |                  |                  | 0,00001                           |
| TNFAIP6 (TSG6)    | Tumor necrosis factor, alpha-induced protein 6                           |                  | Yes              | 0,00001                           |
| CSPG2             | Chondroitin sulfate proteoglycan 2 (versican)                            |                  | Yes              | 0,00001                           |
| NTRK3             | Neurotrophic tyrosine kinase, receptor, type 3                           | Yes              |                  | 0,00001                           |
| SELENBP1          | Selenium binding protein 1; selenium binding protein 1                   | Yes              |                  | 0,00001                           |
| KIAA0960 (THSD7A) | KIAA0960 protein (thrombospondin, type I, domain containing 7A)          | Yes              |                  | 0,00001                           |
| BTBD11            | BTB (POZ) domain containing 11                                           | Yes              |                  | 0,00001                           |
| CDH1              | Cadherin 1, type 1, E-cadherin (epithelial)                              | Yes              |                  | 0,00001                           |
| UNQ830            | ASCL830                                                                  | Yes              |                  | 0,00001                           |
| RHOBTB1           | Rho-related BTB domain containing 1                                      |                  |                  | 0,00002                           |
| RASEF             | RAS and EF-hand domain containing                                        |                  |                  | 0,00002                           |
| CA12              | Carbonic anhydrase XII                                                   | Yes              |                  | 0,00003                           |
| NOTCH3            | Notch homolog 3 (Drosophila)                                             | Yes              |                  | 0,00003                           |
| CA11              | Carbonic anhydrase XI                                                    |                  | Yes              | 0,00003                           |
| GARNL4            | GTPase activating Rap/RanGAP domain-like 4                               |                  |                  | 0,00004                           |
| CD14              | CD14 antigen; monocyte differentiation antigen CD142                     | Yes              |                  | 0,00005                           |
| CPLX2             | Complexin 2                                                              |                  |                  | 0,00005                           |
| PLD5              | Phospholipase D family, member 5                                         | Yes              |                  | 0,00005                           |
| KCNV1             | Potassium channel, subfamily V, member 1                                 | Yes              |                  | 0,00006                           |
| RNASE4            | Ribonuclease, RNase A family, 4                                          |                  | Yes              | 0,00007                           |
| VAV3              | Vav 3 oncogene                                                           | Yes              |                  | 0,00007                           |
| FA2H              | Fatty acid 2-hydroxylase                                                 | Yes              |                  | 0,00007                           |
| EGLN3             | Egl nine homolog 3 (C. elegans)                                          |                  |                  | 0,00007                           |
| DF                | D component of complement (adipsin)                                      |                  | Yes              | 0,00009                           |
| DAPK1             | Death-associated protein kinase 1                                        |                  |                  | 0,00009                           |
| PPARGC1A          | Peroxisome proliferative activated receptor, gamma, coactivator 1, alpha |                  |                  | 0,00014                           |
| MTAC2D1 (TC2N)    | Membrane targeting (tandem) C2 domain containing 1                       |                  |                  | 0,00014                           |
| C14orf147         | Chromosome 14 open reading frame 147                                     | Yes              |                  | 0,00022                           |
| FN1               | Fibronectin 1                                                            |                  | Yes              | 0,00025                           |
| AQP3              | Aquaporin 3                                                              | Yes              |                  | 0,00033                           |
| MGC34646          | Hypothetical protein MGC34646                                            |                  |                  | 0,00035                           |
| AKR1C1            | Aldo-keto reductase family 1, member C1                                  |                  |                  | 0,00038                           |
| RTN4RL2           | Reticulon 4 receptor-like 2                                              | Yes              |                  | 0,00041                           |
| FGA               | Fibrinogen alpha chain                                                   |                  | Yes              | 0,00088                           |
| MUC5B             | Mucin 5, subtype B, tracheobronchial                                     |                  | Yes              | 0,00094                           |
