# Supplementary material
Source: PubMed Central journal article supplement (PMC3717253)

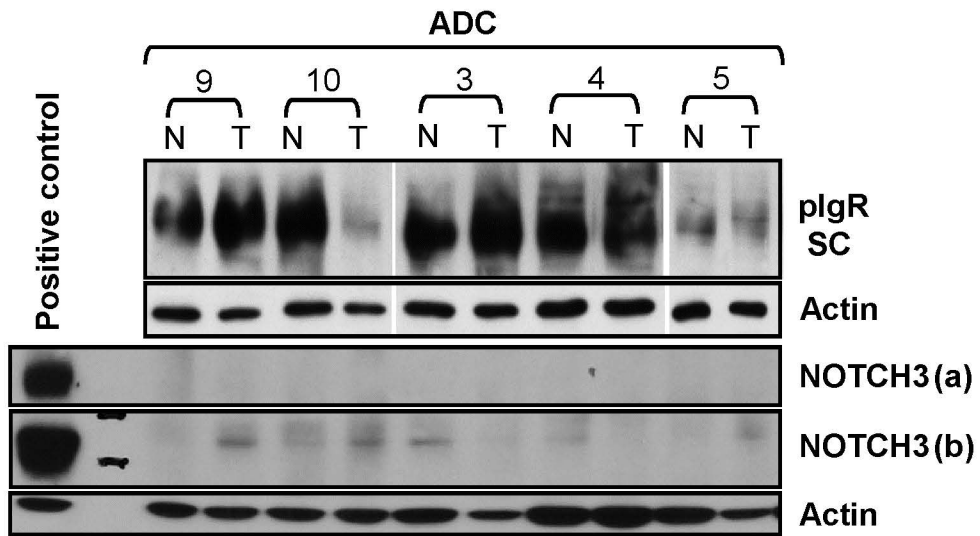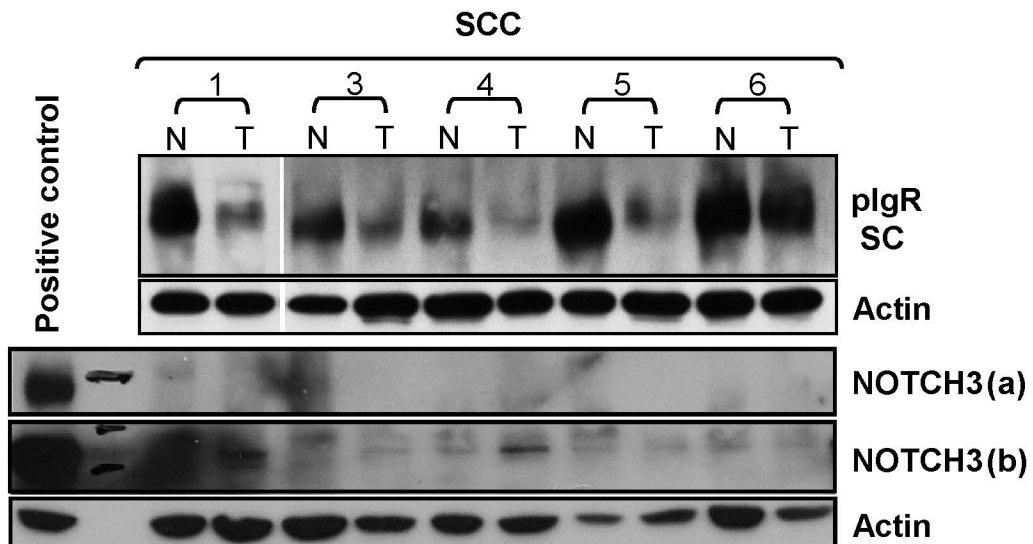

Supplement: NIHMS488584-supplement-Figure_S2.pdf [file NIHMS488584-supplement-Figure_S2.pdf]
